# Supplementary material for: Changes in Initial Opioid Prescribing Practices After the 2016 Release of the CDC Guideline for Prescribing Opioids for Chronic Pain
Source: PubMed Central journal article supplement (PMC8278262; doi:10.1001/jamanetworkopen.2021.16860), 2021-07-13
Supplement: jamanetwopen-e2116860-s001.pdf [file jamanetwopen-e2116860-s001.pdf]

## Supplemental Online Content

Goldstick JE, Guy GP, Losby JL, Baldwin G, Myers M, Bohnert ASB. Changes in initial opioid prescribing practices after the 2016 release of the CDC Guideline for Prescribing Opioids for Chronic Pain. *JAMA Netw Open*. 2021;4(7):e2116860. doi:10.1001/jamanetworkopen.2021.16860

**eFigure 1.** Schematic Diagram of the Time Windows for Each Preguideline and Postguideline Cohort

**eFigure 2.** Proportion of All Beneficiaries Who Disenrolled From Coverage During Each Month

**eFigure 3.** Boxplot of Initial Prescription Durations Among Patients Who Were Opioid Naive in Each Cohort

**eTable 1.** Cancer and Palliative Care Diagnosis Codes Used for Exclusion Criteria

**eTable 2.** Age Distribution by Cohort Among Commercially Insured, Medicare Advantage Patients, and the Total Cohort

**eTable 3.** Race/Ethnicity Distribution by Cohort Among Commercially Insured, Medicare Advantage Patients, and the Total Cohort

**eTable 4.** Region Distribution by Cohort and Stratified by Insurer Type

**eTable 5.** Sex Distribution by Cohort Among Commercially Insured, Medicare Advantage Patients, and the Total Cohort

**eTable 6.** NHIS-Based Estimates of Commercially Insured Patient Demographics and Medicare Plus Insured Patient Demographics

**eTable 7.** Percentage of Enrollees Who Received a New Opioid Prescription During the Follow-up Period in Each Cohort

**eTable 8.** Mean Duration of Initial Opioid Prescription Among Patients Who Were Opioid Naive and Who Subsequently Received an Opioid Prescription by Cohort and Demographic; United States, 2011-2017

**eTable 9.** Percentage of Patients Who Were Opioid Naive and Who Subsequently Received an Opioid Prescription at 50 Morphine Milligram Equivalents Per Day or More

This supplemental material has been provided by the authors to give readers additional information about their work.

**eFigure 1.** Schematic Diagram of the Time Windows for Each Preguideline and Postguideline Cohort

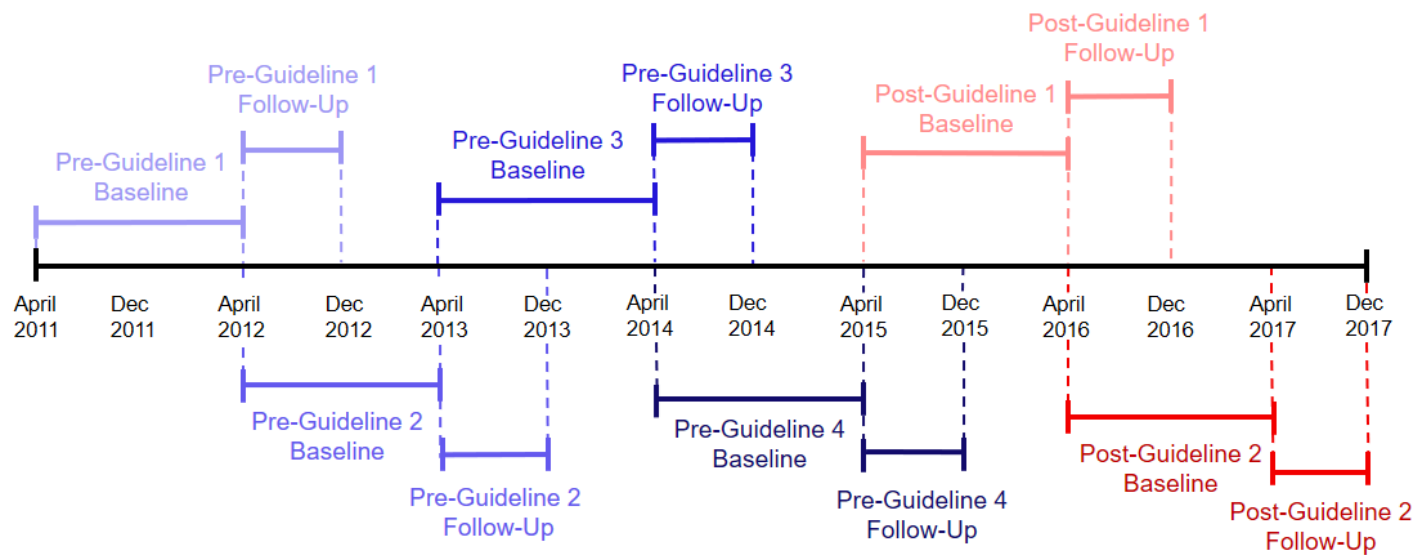

Note: To qualify for each cohort individuals were required to: 1) be continuously enrolled for the entire 21-month period; 2) have 0 total Morphine Milligram Equivalents (MMEs) during their baseline period; and 3) Not having any diagnoses for cancer, palliative care, or end-of-life care at any time from 2011-2018.

**eFigure 2.** Proportion of All Beneficiaries Who Disenrolled From Coverage During Each Month

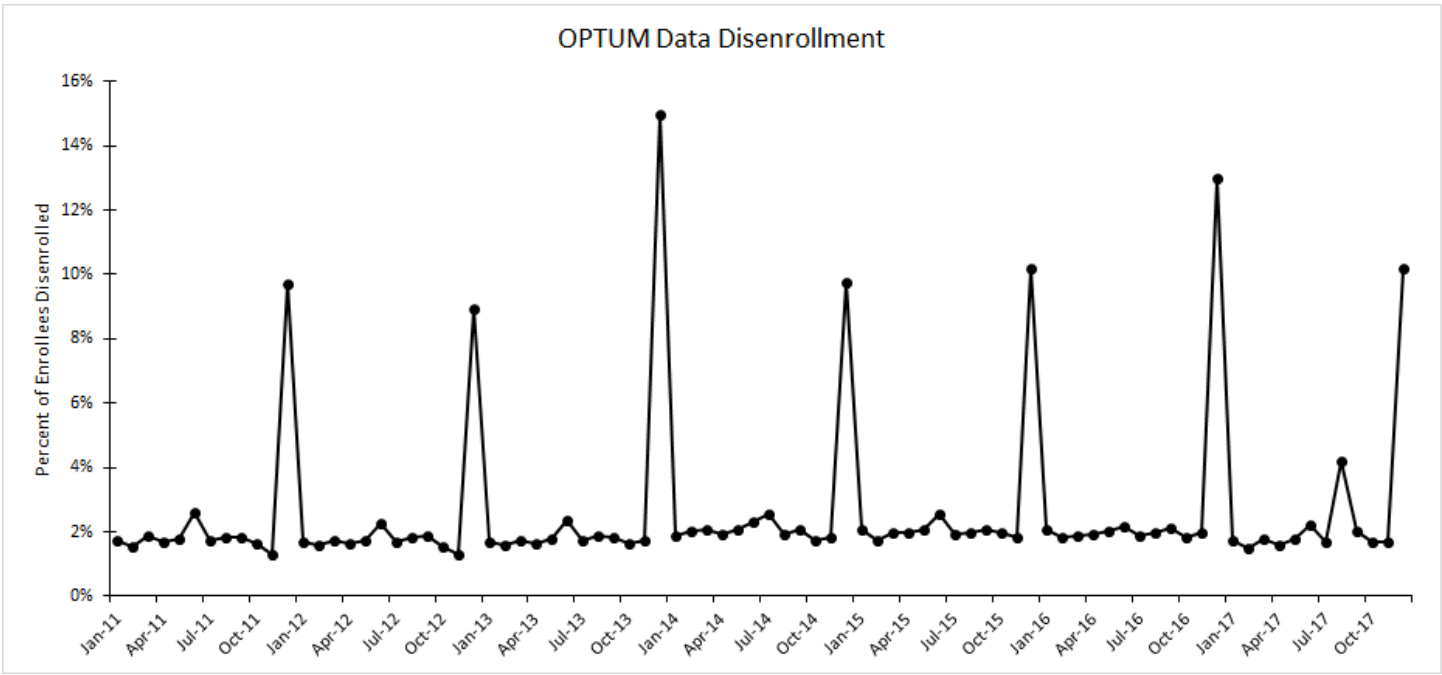

**eFigure 3.** Boxplot of Initial Prescription Durations Among Patients Who Were Opioid Naive in Each Cohort

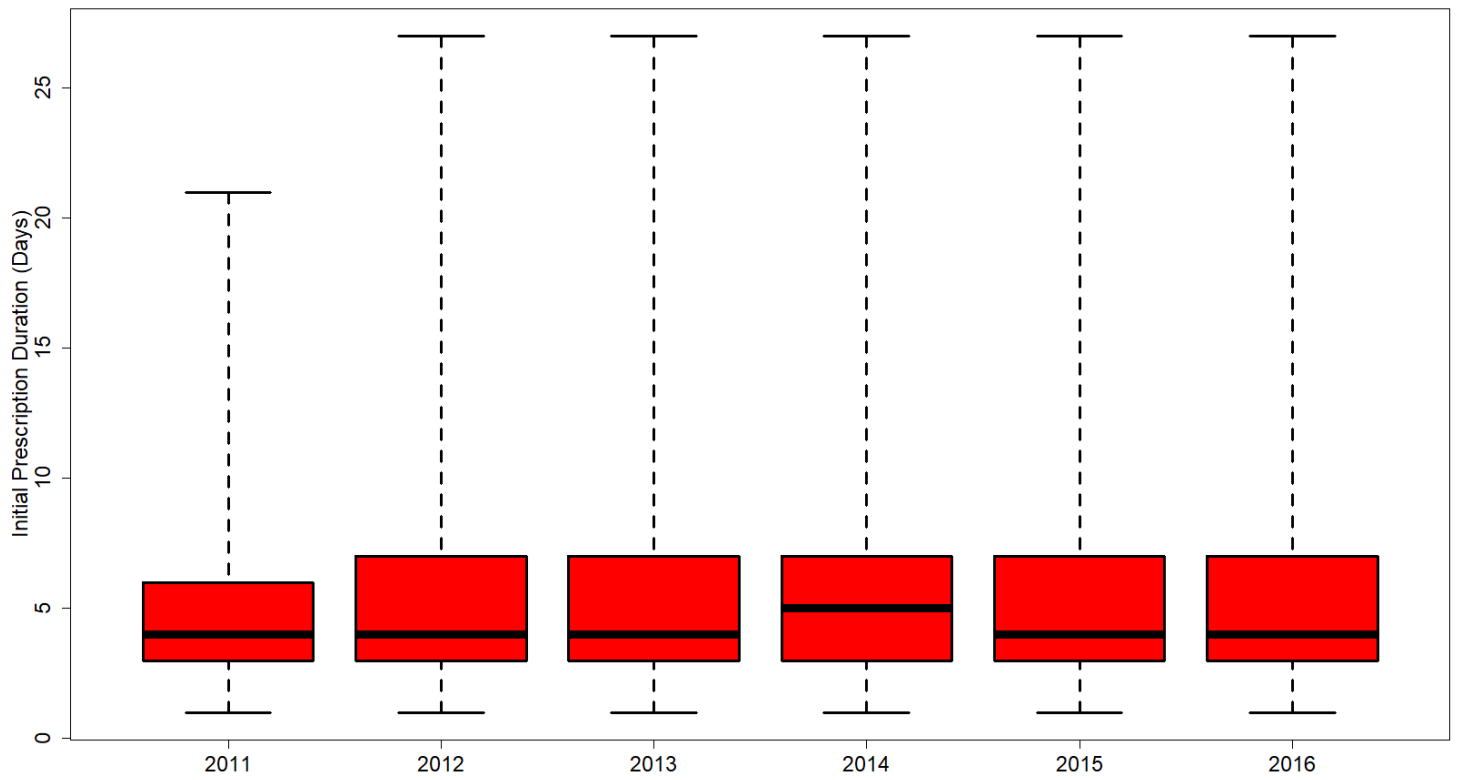

Note: Whiskers extend up to five times the interquartile range above the 75<sup>th</sup> percentile

**eTable 1.** Cancer and Palliative Care Diagnosis Codes Used for Exclusion Criteria

| <b>Table X</b> ICD-9 CM, ICD-10 CM, Cancer/Palliative Care Code Exclusions |                                       |               |
|----------------------------------------------------------------------------|---------------------------------------|---------------|
|                                                                            | <b>ICD-9</b>                          | <b>ICD-10</b> |
| Cancer (Malignant Neoplasm) Diagnosis*                                     | 140.X–208.X,<br>209.0–209.3,<br>V10.X | C00X–C97X     |
| Palliative Care                                                            | V66.7                                 | Z51.5         |
| *Excluding benign neoplasms or neoplasms of uncertain behavior             |                                       |               |

**eTable 2.** Age Distribution by Cohort Among Commercially Insured, Medicare Advantage Patients, and the Total Cohort

| Commercial              |                      |                      |                      |                    |
|-------------------------|----------------------|----------------------|----------------------|--------------------|
| Year                    | Age 18-34            | Age 35-54            | Age 55-74            | Age 75+            |
| Pre-Guideline Cohort 1  | 1,171,553<br>(32.0%) | 1,737,007<br>(47.4%) | 713,343<br>(19.5%)   | 42,275<br>(1.2%)   |
| Pre-Guideline Cohort 2  | 1,193,784<br>(32.5%) | 1,721,370<br>(46.9%) | 723,113<br>(19.7%)   | 30,174<br>(0.8%)   |
| Pre-Guideline Cohort 3  | 1,104,662<br>(33.5%) | 1,534,174<br>(46.5%) | 632,629<br>(19.2%)   | 26,162<br>(0.8%)   |
| Pre-Guideline Cohort 4  | 1,182,535<br>(33.9%) | 1,605,676<br>(46.1%) | 670,712<br>(19.2%)   | 25,336<br>(0.7%)   |
| Post-Guideline Cohort 1 | 1,233,130<br>(33.5%) | 1,675,721<br>(45.6%) | 742,793<br>(20.2%)   | 26,060<br>(0.7%)   |
| Post-Guideline Cohort 2 | 1,328,032<br>(33.8%) | 1,776,120<br>(45.2%) | 795,678<br>(20.3%)   | 29,371<br>(0.7%)   |
| Medicare                |                      |                      |                      |                    |
| Year                    | Age 18-34            | Age 35-54            | Age 55-74            | Age 75+            |
| Pre-Guideline Cohort 1  | 3,185<br>(0.3%)      | 29,354<br>(2.8%)     | 602,388<br>(57.8%)   | 406,988<br>(39.1%) |
| Pre-Guideline Cohort 2  | 3,754<br>(0.3%)      | 33,285<br>(2.8%)     | 699,762<br>(58.2%)   | 464,570<br>(38.7%) |
| Pre-Guideline Cohort 3  | 3,998<br>(0.3%)      | 33,736<br>(2.9%)     | 684,874<br>(58.1%)   | 455,483<br>(38.7%) |
| Pre-Guideline Cohort 4  | 4,477<br>(0.3%)      | 34,275<br>(2.6%)     | 758,808<br>(57.7%)   | 517,991<br>(39.4%) |
| Post-Guideline Cohort 1 | 5,130<br>(0.3%)      | 37,450<br>(2.4%)     | 891,168<br>(57.2%)   | 623,506<br>(40.0%) |
| Post-Guideline Cohort 2 | 6,842<br>(0.4%)      | 49,002<br>(2.6%)     | 1,097,259<br>(57.6%) | 751,784<br>(39.5%) |
| Total                   |                      |                      |                      |                    |
| Year                    | Age 18-34            | Age 35-54            | Age 55-74            | Age 75+            |
| Pre-Guideline Cohort 1  | 1,174,738<br>(25.0%) | 1,766,361<br>(37.5%) | 1,315,731<br>(28.0%) | 449,263<br>(9.5%)  |
| Pre-Guideline Cohort 2  | 1,197,538<br>(24.6%) | 1,754,655<br>(36.0%) | 1,422,875<br>(29.2%) | 494,744<br>(10.2%) |
| Pre-Guideline Cohort 3  | 1,108,660<br>(24.8%) | 1,567,910<br>(35.0%) | 1,317,503<br>(29.4%) | 481,645<br>(10.8%) |
| Pre-Guideline Cohort 4  | 1,187,012<br>(24.7%) | 1,639,951<br>(34.2%) | 1,429,520<br>(29.8%) | 543,327<br>(11.3%) |
| Post-Guideline Cohort 1 | 1,238,260<br>(23.7%) | 1,713,171<br>(32.7%) | 1,633,961<br>(31.2%) | 649,566<br>(12.4%) |
| Post-Guideline Cohort 2 | 1,334,874<br>(22.9%) | 1,825,122<br>(31.3%) | 1,892,937<br>(32.4%) | 781,155<br>(13.4%) |

**eTable 3.** Race/Ethnicity Distribution by Cohort Among Commercially Insured, Medicare Advantage Patients, and the Total Cohort

| Commercial              |                    |                   |                    |                    |                      |
|-------------------------|--------------------|-------------------|--------------------|--------------------|----------------------|
| Year                    | Unknown            | Asian             | Black              | Hispanic           | White                |
| Pre-Guideline Cohort 1  | 243,323<br>(6.6%)  | 199,454<br>(5.4%) | 345,489<br>(9.4%)  | 396,516<br>(10.8%) | 2,479,396<br>(67.7%) |
| Pre-Guideline Cohort 2  | 241,506<br>(6.6%)  | 208,108<br>(5.7%) | 340,178<br>(9.3%)  | 401,333<br>(10.9%) | 2,477,316<br>(67.5%) |
| Pre-Guideline Cohort 3  | 219,272<br>(6.6%)  | 196,918<br>(6.0%) | 271,081<br>(8.2%)  | 395,276<br>(12.0%) | 2,215,080<br>(67.2%) |
| Pre-Guideline Cohort 4  | 238,780<br>(6.9%)  | 207,589<br>(6.0%) | 291,130<br>(8.4%)  | 431,157<br>(12.4%) | 2,315,603<br>(66.5%) |
| Post-Guideline Cohort 1 | 240,044<br>(6.5%)  | 221,202<br>(6.0%) | 308,458<br>(8.4%)  | 469,137<br>(12.8%) | 2,438,863<br>(66.3%) |
| Post-Guideline Cohort 2 | 413,438<br>(10.5%) | 224,491<br>(5.7%) | 310,124<br>(7.9%)  | 488,546<br>(12.4%) | 2,492,602<br>(63.4%) |
| Medicare                |                    |                   |                    |                    |                      |
| Year                    | Unknown            | Asian             | Black              | Hispanic           | White                |
| Pre-Guideline Cohort 1  | 179,412<br>(17.2%) | 31,210<br>(3.0%)  | 87,398<br>(8.4%)   | 93,530<br>(9.0%)   | 650,365<br>(62.4%)   |
| Pre-Guideline Cohort 2  | 183,748<br>(15.3%) | 50,485<br>(4.2%)  | 105,652<br>(8.8%)  | 111,526<br>(9.3%)  | 749,960<br>(62.4%)   |
| Pre-Guideline Cohort 3  | 180,123<br>(15.3%) | 53,078<br>(4.5%)  | 95,674<br>(8.1%)   | 116,198<br>(9.9%)  | 733,018<br>(62.2%)   |
| Pre-Guideline Cohort 4  | 196,927<br>(15.0%) | 57,703<br>(4.4%)  | 107,113<br>(8.1%)  | 144,247<br>(11.0%) | 809,561<br>(61.5%)   |
| Post-Guideline Cohort 1 | 237,734<br>(15.3%) | 64,285<br>(4.1%)  | 133,992<br>(8.6%)  | 159,567<br>(10.2%) | 961,676<br>(61.8%)   |
| Post-Guideline Cohort 2 | 289,295<br>(15.2%) | 69,534<br>(3.7%)  | 191,135<br>(10.0%) | 187,376<br>(9.8%)  | 1,167,547<br>(61.3%) |
| Total                   |                    |                   |                    |                    |                      |
| Year                    | Unknown            | Asian             | Black              | Hispanic           | White                |
| Pre-Guideline Cohort 1  | 422,735<br>(9.0%)  | 230,664<br>(4.9%) | 432,887<br>(9.2%)  | 490,046<br>(10.4%) | 3,129,761<br>(66.5%) |
| Pre-Guideline Cohort 2  | 425,254<br>(8.7%)  | 258,593<br>(5.3%) | 445,830<br>(9.2%)  | 512,859<br>(10.5%) | 3,227,276<br>(66.3%) |
| Pre-Guideline Cohort 3  | 399,395<br>(8.9%)  | 249,996<br>(5.6%) | 366,755<br>(8.2%)  | 511,474<br>(11.4%) | 2,948,098<br>(65.9%) |
| Pre-Guideline Cohort 4  | 435,707<br>(9.1%)  | 265,292<br>(5.5%) | 398,243<br>(8.3%)  | 575,404<br>(12.0%) | 3,125,164<br>(65.1%) |
| Post-Guideline Cohort 1 | 477,778<br>(9.1%)  | 285,487<br>(5.5%) | 442,450<br>(8.5%)  | 628,704<br>(12.0%) | 3,400,539<br>(65.0%) |
| Post-Guideline Cohort 2 | 702,733<br>(12.0%) | 294,025<br>(5.0%) | 501,259<br>(8.6%)  | 675,922<br>(11.6%) | 3,660,149<br>(62.7%) |

**eTable 4.** Region Distribution by Cohort and Stratified by Insurer Type

| Commercial              |                      |                      |                      |                    |                  |                   |
|-------------------------|----------------------|----------------------|----------------------|--------------------|------------------|-------------------|
| Year                    | West                 | Midwest              | South                | Northeast          | Pacific          | Unknown           |
| Pre-Guideline Cohort 1  | 730,598<br>(19.9%)   | 944,594<br>(25.8%)   | 1,590,444<br>(43.4%) | 380,466<br>(10.4%) | 2,481<br>(0.1%)  | 15,595<br>(0.4%)  |
| Pre-Guideline Cohort 2  | 750,380<br>(20.5%)   | 964,323<br>(26.3%)   | 1,555,238<br>(42.4%) | 368,040<br>(10.0%) | 2,510<br>(0.1%)  | 27,950<br>(0.8%)  |
| Pre-Guideline Cohort 3  | 719,034<br>(21.8%)   | 911,726<br>(27.6%)   | 1,297,445<br>(39.3%) | 330,208<br>(10.0%) | 2,223<br>(0.1%)  | 36,991<br>(1.1%)  |
| Pre-Guideline Cohort 4  | 748,507<br>(21.5%)   | 958,751<br>(27.5%)   | 1,374,387<br>(39.4%) | 348,808<br>(10.0%) | 2,666<br>(0.1%)  | 51,140<br>(1.5%)  |
| Post-Guideline Cohort 1 | 784,533<br>(21.3%)   | 1,008,291<br>(27.4%) | 1,460,199<br>(39.7%) | 377,425<br>(10.3%) | 2,831<br>(0.1%)  | 44,425<br>(1.2%)  |
| Post-Guideline Cohort 2 | 838,609<br>(21.3%)   | 1,039,149<br>(26.4%) | 1,495,979<br>(38.1%) | 379,416<br>(9.7%)  | 2,852<br>(0.1%)  | 173,196<br>(4.4%) |
| Medicare                |                      |                      |                      |                    |                  |                   |
| Year                    | West                 | Midwest              | South                | Northeast          | Pacific          | Unknown           |
| Pre-Guideline Cohort 1  | 375,379<br>(36.0%)   | 215,979<br>(20.7%)   | 338,290<br>(32.5%)   | 85,827<br>(8.2%)   | 9,402<br>(0.9%)  | 17,038<br>(1.6%)  |
| Pre-Guideline Cohort 2  | 383,575<br>(31.9%)   | 247,390<br>(20.6%)   | 373,364<br>(31.1%)   | 170,918<br>(14.2%) | 9,779<br>(0.8%)  | 16,345<br>(1.4%)  |
| Pre-Guideline Cohort 3  | 382,503<br>(32.5%)   | 262,451<br>(22.3%)   | 324,018<br>(27.5%)   | 180,257<br>(15.3%) | 8,451<br>(0.7%)  | 20,411<br>(1.7%)  |
| Pre-Guideline Cohort 4  | 397,713<br>(30.2%)   | 298,967<br>(22.7%)   | 398,725<br>(30.3%)   | 206,748<br>(15.7%) | 8,966<br>(0.7%)  | 4,432<br>(0.3%)   |
| Post-Guideline Cohort 1 | 431,229<br>(27.7%)   | 343,839<br>(22.1%)   | 524,222<br>(33.7%)   | 241,461<br>(15.5%) | 11,634<br>(0.7%) | 4,869<br>(0.3%)   |
| Post-Guideline Cohort 2 | 483,479<br>(25.4%)   | 431,406<br>(22.6%)   | 693,799<br>(36.4%)   | 284,398<br>(14.9%) | 6,461<br>(0.3%)  | 5,344<br>(0.3%)   |
| Total                   |                      |                      |                      |                    |                  |                   |
| Year                    | West                 | Midwest              | South                | Northeast          | Pacific          | Unknown           |
| Pre-Guideline Cohort 1  | 1,105,977<br>(23.5%) | 1,160,573<br>(24.7%) | 1,928,734<br>(41.0%) | 466,293<br>(9.9%)  | 11,883<br>(0.3%) | 32,633<br>(0.7%)  |
| Pre-Guideline Cohort 2  | 1,133,955<br>(23.3%) | 1,211,713<br>(24.9%) | 1,928,602<br>(39.6%) | 538,958<br>(11.1%) | 12,289<br>(0.3%) | 44,295<br>(0.9%)  |
| Pre-Guideline Cohort 3  | 1,101,537<br>(24.6%) | 1,174,177<br>(26.2%) | 1,621,463<br>(36.2%) | 510,465<br>(11.4%) | 10,674<br>(0.2%) | 57,402<br>(1.3%)  |
| Pre-Guideline Cohort 4  | 1,146,220<br>(23.9%) | 1,257,718<br>(26.2%) | 1,773,112<br>(36.9%) | 555,556<br>(11.6%) | 11,632<br>(0.2%) | 55,572<br>(1.2%)  |
| Post-Guideline Cohort 1 | 1,215,762<br>(23.2%) | 1,352,130<br>(25.8%) | 1,984,421<br>(37.9%) | 618,886<br>(11.8%) | 14,465<br>(0.3%) | 49,294<br>(0.9%)  |
| Post-Guideline Cohort 2 | 1,322,088<br>(22.7%) | 1,470,555<br>(25.2%) | 2,189,778<br>(37.5%) | 663,814<br>(11.4%) | 9,313<br>(0.2%)  | 178,540<br>(3.1%) |

Regional categories based on census categories West, Midwest, Northeast, and South ([https://www2.census.gov/geo/pdfs/maps-data/maps/reference/us\\_regdiv.pdf](https://www2.census.gov/geo/pdfs/maps-data/maps/reference/us_regdiv.pdf)). Additionally, added “Pacific” to refer to Puerto Rico, Hawaii, and Alaska.



**eTable 5.** Sex Distribution by Cohort Among Commercially Insured, Medicare Advantage Patients, and the Total Cohort

| Commercial              |           |           |         |
|-------------------------|-----------|-----------|---------|
| Year                    | Male      | Female    | Unknown |
| Pre-Guideline Cohort 1  | 1,876,731 | 1,786,748 | 699     |
|                         | (51.2%)   | (48.8%)   | (0.0%)  |
| Pre-Guideline Cohort 2  | 1,888,038 | 1,779,763 | 640     |
|                         | (51.5%)   | (48.5%)   | (0.0%)  |
| Pre-Guideline Cohort 3  | 1,727,385 | 1,569,691 | 551     |
|                         | (52.4%)   | (47.6%)   | (0.0%)  |
| Pre-Guideline Cohort 4  | 1,825,382 | 1,658,428 | 449     |
|                         | (52.4%)   | (47.6%)   | (0.0%)  |
| Post-Guideline Cohort 1 | 1,922,439 | 1,754,910 | 355     |
|                         | (52.3%)   | (47.7%)   | (0.0%)  |
| Post-Guideline Cohort 2 | 2,071,439 | 1,857,466 | 296     |
|                         | (52.7%)   | (47.3%)   | (0.0%)  |
| Medicare                |           |           |         |
| Year                    | Male      | Female    | Unknown |
| Pre-Guideline Cohort 1  | 437,213   | 604,702   | 0       |
|                         | (42.0%)   | (58.0%)   | (0.0%)  |
| Pre-Guideline Cohort 2  | 508,666   | 692,705   | 0       |
|                         | (42.3%)   | (57.7%)   | (0.0%)  |
| Pre-Guideline Cohort 3  | 503,385   | 674,706   | 0       |
|                         | (42.7%)   | (57.3%)   | (0.0%)  |
| Pre-Guideline Cohort 4  | 551,168   | 764,383   | 0       |
|                         | (41.9%)   | (58.1%)   | (0.0%)  |
| Post-Guideline Cohort 1 | 643,805   | 913,449   | 0       |
|                         | (41.3%)   | (58.7%)   | (0.0%)  |
| Post-Guideline Cohort 2 | 788,664   | 1,116,223 | 0       |
|                         | (41.4%)   | (58.6%)   | (0.0%)  |
| Total                   |           |           |         |
| Year                    | Male      | Female    | Unknown |
| Pre-Guideline Cohort 1  | 2,313,944 | 2,391,450 | 699     |
|                         | (49.2%)   | (50.8%)   | (0.0%)  |
| Pre-Guideline Cohort 2  | 2,396,704 | 2,472,468 | 640     |
|                         | (49.2%)   | (50.8%)   | (0.0%)  |
| Pre-Guideline Cohort 3  | 2,230,770 | 2,244,397 | 551     |
|                         | (49.8%)   | (50.1%)   | (0.0%)  |
| Post-Guideline Cohort 4 | 2,376,550 | 2,422,811 | 449     |
|                         | (49.5%)   | (50.5%)   | (0.0%)  |
| Post-Guideline Cohort 1 | 2,566,244 | 2,668,359 | 355     |
|                         | (49.0%)   | (51.0%)   | (0.0%)  |
| Pre-Guideline Cohort 2  | 2,860,103 | 2,973,689 | 296     |
|                         | (49.0%)   | (51.0%)   | (0.0%)  |

**eTable 6.** NHIS-Based Estimates of Commercially Insured Patient Demographics and Medicare Plus Insured Patient Demographics

| Among All Commercially Insured               |                     |                         |                       |                      |
|----------------------------------------------|---------------------|-------------------------|-----------------------|----------------------|
| Year                                         | Age (mean; 95% CI)  | Gender (% male, 95% CI) | Race (%White, 95% CI) | Race(%Black, 95% CI) |
| 2012                                         | 38.24 (38.06-38.41) | 49.0 (48.6-49.4)        | 83.4 (82.7-84.0)      | 9.7 (9.1-10.2)       |
| 2013                                         | 38.29 (38.11-38.46) | 49.2 (48.8-49.5)        | 83.0 (82.3-83.7)      | 9.8 (9.2-10.3)       |
| 2014                                         | 38.39 (38.23-38.56) | 49.3 (49.0-49.7)        | 82.7 (82.0-83.3)      | 9.8 (9.2-10.3)       |
| 2015                                         | 38.19 (38.02-38.36) | 49.1 (48.8-49.5)        | 81.9 (81.2-82.6)      | 10.2 (9.7-10.8)      |
| 2016                                         | 38.38 (38.21-38.55) | 49.4 (49.0-49.8)        | 81.3 (80.2-82.5)      | 10.4 (9.6-11.3)      |
| 2017                                         | 38.37 (38.18-38.56) | 49.3 (48.9-49.7)        | 81.1 (79.7-82.4)      | 10.4 (9.5-11.4)      |
| Among those Enrolled in Medicare Plus Choice |                     |                         |                       |                      |
| Year                                         | Age (mean; 95% CI)  | Gender(% male; 95% CI)  | Race (%White; 95% CI) | Race(%Black; 95% CI) |
| 2012                                         | 72.21 (71.88-72.54) | 43.1 (41.3-44.9)        | 86.5 (84.6-88.2)      | 9.4 (8.0-11.1)       |
| 2013                                         | 71.52 (71.17-71.86) | 42.7 (41.1-44.2)        | 86.6 (84.9-88.1)      | 8.8 (7.6-10.1)       |
| 2014                                         | 72.25 (71.93-72.56) | 43.9 (42.3-45.6)        | 86.8 (85.2-88.3)      | 8.7 (7.5-10.1)       |
| 2015                                         | 72.11 (71.82-72.40) | 44.4 (42.9-45.9)        | 84.9 (83.1-86.6)      | 10.1 (8.8-11.6)      |
| 2016                                         | 71.88 (71.59-72.17) | 43.7 (42.3-45.2)        | 84.8 (82.8-86.6)      | 10 (8.7-11.6)        |
| 2017                                         | 71.9 (71.61-72.20)  | 44.1 (42.7-45.6)        | 84.2 (82.1-86.1)      | 10.1 (8.5-11.9)      |

**Note:** For comparison with the cohort composition, 2012, 2013, 2014, 2015, 2016, 2017 are most closely aligned temporally with Pre-Guideline Cohort 1, Pre-Guideline Cohort 2, Pre-Guideline Cohort 3, Pre-Guideline Cohort 4, Post-Guideline Cohort 1, and Post-Guideline Cohort 2, respectively.

**eTable 7.** Percentage of Enrollees Who Received a New Opioid Prescription During the Follow-up Period in Each Cohort

|                    | Total              | Female             | Male               | White              | Non-white          | Commercial         | Medicare Advantage |
|--------------------|--------------------|--------------------|--------------------|--------------------|--------------------|--------------------|--------------------|
| Pre-Guideline 1    | 558,175<br>(11.9%) | 310,650<br>(13.0%) | 247,425<br>(10.7%) | 385,855<br>(12.3%) | 134,612<br>(11.7%) | 441,490<br>(12.0%) | 116,685<br>(11.1%) |
| Pre-Guideline 2    | 556,234<br>(11.4%) | 309,423<br>(12.5%) | 246,732<br>(10.3%) | 383,397<br>(11.9%) | 136,385<br>(11.2%) | 421,652<br>(11.4%) | 134,582<br>(11.2%) |
| Pre-Guideline 3    | 472,511<br>(10.6%) | 259,200<br>(11.5%) | 213,251<br>(9.6%)  | 325,781<br>(11.1%) | 114,895<br>(10.2%) | 348,682<br>(10.5%) | 123,829<br>(10.5%) |
| Pre-Guideline 4    | 487,131<br>(10.1%) | 269,788<br>(11.1%) | 217,277<br>(9.1%)  | 327,349<br>(10.5%) | 120,133<br>(9.7%)  | 345,900<br>(9.8%)  | 141,231<br>(10.7%) |
| Post-Guideline 1   | 505,155<br>(9.6%)  | 280,818<br>(10.5%) | 224,310<br>(8.7%)  | 338,484<br>(10.0%) | 127,004<br>(9.4%)  | 352,350<br>(9.5%)  | 152,805<br>(9.8%)  |
| Post-Guideline 2   | 532,962<br>(9.1%)  | 297,391<br>(10.0%) | 235,554<br>(8.2%)  | 349,555<br>(9.6%)  | 134,358<br>(9.1%)  | 343,514<br>(8.7%)  | 189,448<br>(9.9%)  |
| (actual-predicted) | <b>+0.1%</b>       | <b>+0.1%</b>       | <b>+0.1%</b>       | <b>+0.2%</b>       | <b>+0.7%</b>       | <b>+0.1%</b>       | <b>-0.1%</b>       |

*Note:* The final row shows the difference between the observed level in the Post-Guideline group 2, and what was projected based on a linear extrapolation of the pre-guideline trend.

*Note 2:* Those with missing values for race were excluded from the “white” and “non-white” groups, but were not excluded from any other columns

**eTable 8.** Mean Duration of Initial Opioid Prescription Among Patients Who Were Opioid Naive and Who Subsequently Received an Opioid Prescription by Cohort and Demographic; United States, 2011-2017

|                                 | Overall      | Female       | Male         | White        | Non-white    | Commercial Insurance | Medicare Advantage |
|---------------------------------|--------------|--------------|--------------|--------------|--------------|----------------------|--------------------|
| Pre-Guideline 1                 | 6.17         | 6.31         | 6.00         | 6.01         | 6.54         | 5.50                 | 8.73               |
| Pre-Guideline 2                 | 6.40         | 6.57         | 6.19         | 6.22         | 6.79         | 5.61                 | 8.87               |
| Pre-Guideline 3                 | 6.49         | 6.65         | 6.30         | 6.29         | 6.93         | 5.62                 | 8.93               |
| Pre-Guideline 4                 | 6.64         | 6.84         | 6.39         | 6.35         | 7.04         | 5.62                 | 9.14               |
| Post-Guideline 1                | 6.49         | 6.70         | 6.24         | 6.25         | 6.93         | 5.52                 | 8.72               |
| Post-Guideline 2                | 6.38         | 6.61         | 6.09         | 6.11         | 6.89         | 5.22                 | 8.49               |
| (actual-pred)                   | <b>-0.57</b> | <b>-0.56</b> | <b>-0.59</b> | <b>-0.50</b> | <b>-0.51</b> | <b>-0.51</b>         | <b>-0.88</b>       |
| % change (difference/predicted) | <b>-8.2%</b> | <b>-7.8%</b> | <b>-8.8%</b> | <b>-7.5%</b> | <b>-6.9%</b> | <b>-8.8%</b>         | <b>-9.4%</b>       |

*Note:* The final row shows the difference between the observed level in the Post-Guideline group 2, and what was projected based on a linear extrapolation of the pre-guideline trend. The % reduction (diff/pred) entry shows the percent change in the actual level, relative to the projection.

*Note 2:* Those with missing values for race were excluded from the “Non-white” group, but were not excluded from any other columns.

**eTable 9.** Percentage of Patients Who Were Opioid Naive and Who Subsequently Received an Opioid Prescription at 50 Morphine Milligram Equivalents Per Day or More

|                  | Total              | Female            | Male              | White             | Non-white         | Commercial         | Medicare Advantage |
|------------------|--------------------|-------------------|-------------------|-------------------|-------------------|--------------------|--------------------|
| Pre-Guideline 1  | 130,883<br>(23.4%) | 71,046<br>(22.9%) | 59,819<br>(24.2%) | 95,532<br>(24.8%) | 26,672<br>(19.8%) | 103,160<br>(23.4%) | 27,723<br>(23.8%)  |
| Pre-Guideline 2  | 120,861<br>(21.7%) | 65,172<br>(21.1%) | 55,675<br>(22.6%) | 88,488<br>(23.1%) | 24,395<br>(17.9%) | 94,390<br>(22.4%)  | 26,471<br>(19.7%)  |
| Pre-Guideline 3  | 110,017<br>(23.3%) | 58,045<br>(22.4%) | 51,959<br>(24.4%) | 81,103<br>(24.9%) | 21,661<br>(18.9%) | 86,920<br>(24.9%)  | 23,097<br>(18.7%)  |
| Pre-Guideline 4  | 110,734<br>(22.7%) | 59,049<br>(21.9%) | 51,672<br>(23.8%) | 80,912<br>(24.7%) | 21,375<br>(17.8%) | 84,359<br>(24.4%)  | 26,375<br>(18.7%)  |
| Post-Guideline 1 | 110,088<br>(21.8%) | 58,693<br>(20.9%) | 51,390<br>(22.9%) | 80,598<br>(23.8%) | 21,172<br>(16.7%) | 82,703<br>(23.5%)  | 27,385<br>(17.9%)  |
| Post-Guideline 2 | 112,312<br>(21.1%) | 60,116<br>(20.2%) | 52,189<br>(22.2%) | 80,813<br>(23.1%) | 21,591<br>(16.1%) | 79,278<br>(23.1%)  | 33,034<br>(17.4%)  |
| (actual-pred)    | <b>-1.5%</b>       | <b>-1.2%</b>      | <b>-1.7%</b>      | <b>-1.8%</b>      | <b>-0.7%</b>      | <b>-2.6%</b>       | <b>+2.2%</b>       |

*Note:* The final row shows the difference between the observed level in the Post-Guideline group 2, and what was projected based on a linear extrapolation of the pre-guideline trend.

*Note 2:* Those with missing values for race were excluded from the “Non-white” group, but were not excluded from any other columns.
